# Supplementary material
Source: Springer Nature journal article supplement (https://www.springermedizin.de/resource/supplementary/12943_2010_662_MOESM5_ESM.pdf/9554510)

## A) MDA-MB-468

mock transfected    CHIP transfected    CHIP-TPR transfected

Control    Cisplatin    LA-12    17-AAG    Control    Cisplatin    LA-12    17-AAG    Control    Cisplatin    LA-12    17-AAG

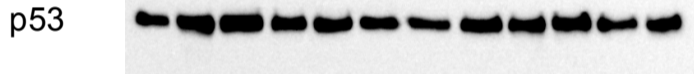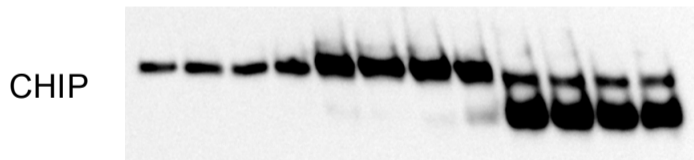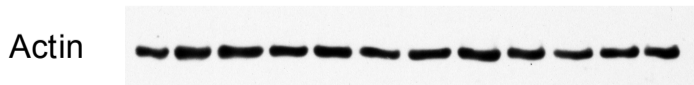

## B) SK-BR-3

mock transfected    CHIP transfected    CHIP-TPR transfected

Control    Cisplatin    LA-12    17-AAG    Control    Cisplatin    LA-12    17-AAG    Control    Cisplatin    LA-12    17-AAG

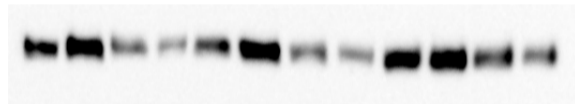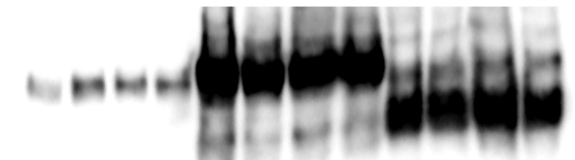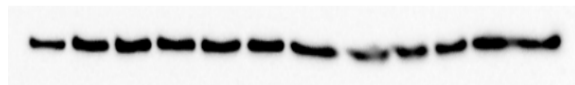

Supplement: MOESM5 [file 9554510]
